# Supplementary material for: A Pan-Cancer Analysis of Transcriptome Changes Associated with Somatic Mutations in U2AF1 Reveals Commonly Altered Splicing Events
Source: PLoS One. 2014 Jan 31;9(1):e87361. doi: 10.1371/journal.pone.0087361 (PMC3909098; doi:10.1371/journal.pone.0087361)
Supplement: File S1 — Column description for Files S2, S3, S4, S5, S6, S7. Description of columns in Files S2, S3, S4, S5, S6, S7 describing alternative splicing events. (XLSX) [file pone.0087361.s002.xlsx]

## Sheet: Sheet1
Column #	Header	Description
1	Contains_Novel_or_only_Known(Annotated)_Junctions	If "N", the event includes a novel splice junction. "K", if all junctions are annotated. The annotation is relative to what was used as the --txt_db3 if (or --txt_db1 by default) in Step 5.
2	as_event_type	Type of alternative splicing event: cassette, alternative_donor (alternative 5' splice site), alternative_acceptor (alternative 3' splice site), mutually_exclusive, coordinate_cassette, alternative_first_exon, alternative_last_exon, jcn_only_AD (alternative 5' splice site, quantified with only junction reads), jcn_only_AA (alternative 3' splice site, quantified with only junction reads)
3	gene_name	Gene(s) associated with the event
4	chr	Chromosome of the event (Note: Fusion genes are not currently supported)
5	strand	"+", "-", or "." if there is ambiguity
6	exclusion_junctions	Coordinates of the first and last position of the intron(s) associated with exclusion isoform(s) of the event. Junctions in distinct isoforms are separated by ";", while grouped junctions from the same isoform are separated by ",".
		alternative_first_exon-, alternative_last_exon-specific description: Some first/last exons will have the same promoter or transcription termination site, but in addition have alternative donor or acceptor splicing (Further explained in Supplemental Material of the JuncBASE paper). To deconvolve differences between alternative promoter/transcription usage and alternative donor/acceptor usage, I gr…
		mutually_exclusive-specific description: Each exclusion exon has a group of two junctions associated with it (the upstream and downstream junction).
7	inclusion_junctions	Coordinates of the first and last position of the intron(s) associated with inclusion isoform of the event. Junctions in distinct isoforms are separated by ";", while grouped junctions from the same isoform are separated by ",". For all alternative splicing event types, only one isoform exists as the inclusion isoform of an event.
		cassette-specific description:Upstream junctions and downstream junctions are grouped separately. The upstream junctions and downstream junctions are separated by ";", while one or more upstream junction (or downstream junction) is separated by ",".
		mutually_exclusive-specific description: The upstream and downstream junctions of the inclusion exon are considered one group. The junctions are separated by ",".
		alternative_first_exon-, alternative_last_exon-specific description: The alternative_first and last exon grouping for the inclusion junctions are explained above for exclusion junctions. For inclusion junctions in alternative first and last exons, they should have a corresponding inclusion exon.
8	exclusion_exons	Coordinates of the first and last position of the exon(s) associated with the exclusion isoform(s). This field is blank for the following events: "cassette" and "coordinate_cassette". Multiple exons are delimited by ";".
9	inclusion_exons	Coordinates of the first and last position of the exon(s) associated with the inclusion isoform(s). Multiple exons are delimted by ";".
		alternative_donor-, alternative_acceptor-specific description: The inclusion exons are given as the position between each splice site and the next most distal splice site. (Further explained in Supplemental Material of the paper)
10	intron-exon_junctions	Coordinates of the intron/exon boundary. This field is blank for all events EXCEPT for the following events: "alternative_donor","alternative_acceptor", and "intron_retention".
11	neighboring_constitutive_exons	Coordinates of the flanking constitutive exons involved in the event. Multiple exons are delimited by ";".
12+	RNA-Seq samples	Sample “percent spliced in” (PSI) values. "NA" values indicate either the total expression of the event was low
