# Supplementary material for: A Pan-Cancer Analysis of Transcriptome Changes Associated with Somatic Mutations in U2AF1 Reveals Commonly Altered Splicing Events
Source: PubMed Central journal article supplement (PMC3909098; doi:10.1371/journal.pone.0087361), 2014-01-31
Supplement: pone.0087361.s001.pdf [file pone.0087361.s001.pdf]

## Supporting Information

### **A pan-cancer analysis of transcriptome alterations associated with somatic mutations in *U2AF1* reveals commonly altered splicing events**

Angela N. Brooks<sup>1,2</sup>, Peter S. Choi<sup>1,2</sup>, Luc de Waal<sup>1,2</sup>, Tanaz Sharifnia<sup>1,2</sup>, Marcin Imielinski<sup>1,2</sup>, Gordon Saksena<sup>1</sup>, Chandra Sekhar Pedamallu<sup>1,2</sup>, Andrey Sivachenko<sup>1</sup>, Mara Rosenberg<sup>1</sup>, Juliann Chmielecki<sup>1,2</sup>, Michael S. Lawrence<sup>1</sup>, David S. DeLuca<sup>1</sup>, Gad Getz<sup>1</sup>, Matthew Meyerson<sup>1,2,3</sup>

<sup>1</sup>Cancer Program, Broad Institute of Harvard and Massachusetts Institute of Technology, Cambridge, Massachusetts, United States of America

<sup>2</sup>Department of Medical Oncology, Dana-Farber Cancer Institute, Boston, Massachusetts, United States of America

<sup>3</sup>Department of Pathology, Harvard Medical School, Boston, Massachusetts, United States of America

# Table of Contents

|                                                                                                                                                                                                                           |           |
|---------------------------------------------------------------------------------------------------------------------------------------------------------------------------------------------------------------------------|-----------|
| <b>SUPPORTING FIGURES</b>                                                                                                                                                                                                 | <b>3</b>  |
| <b>Figure S1:</b> Correlation of $\Delta$ PSI values between JuncBASE and Przychodzen <i>et al.</i> [1]                                                                                                                   | <b>3</b>  |
| <b>Figure S2:</b> Highly variable alternative splicing events in lung adenocarcinoma.                                                                                                                                     | <b>4</b>  |
| <b>Figure S3:</b> Splice site motifs at cassette exon and alternative 3' splice site changes associated with <i>U2AF1</i> S34F mutation in lung adenocarcinoma.                                                           | <b>5</b>  |
| <b>Figure S4:</b> Splice site motifs at cassette exon and alternative 3' splice site changes associated with <i>RBM10</i> loss-of-function (LOF) mutation in lung adenocarcinoma and control alternative splicing events. | <b>6</b>  |
| <b>Figure S5:</b> Splice site motifs at cassette exon and alternative 3' splice site changes associated with induction of <i>U2AF1</i> S34F or <i>U2AF1</i> wild-type in HeLa cells.                                      | <b>7</b>  |
| <b>Figure S6:</b> GSEA enrichment analysis in AML samples.                                                                                                                                                                | <b>8</b>  |
| <b>Figure S7:</b> Expression of V5 tagged <i>U2AF1</i> WT or <i>U2AF1</i> S34F constructs in 293T cells as determined by western blot                                                                                     | <b>9</b>  |
| <b>SUPPORTING TABLES</b>                                                                                                                                                                                                  | <b>10</b> |
| <b>Table S1:</b> The Cancer Genome Atlas sample identifiers used in this study. Somatic mutations in splicing factors are indicated.                                                                                      | <b>10</b> |
| <b>Table S2:</b> Splicing factors reported to be significantly altered in previous studies where <i>U2AF1</i> is somatically mutated.                                                                                     | <b>21</b> |
| <b>Table S3:</b> Mitotic cell cycle genes that show differential splicing in the presence of the <i>U2AF1</i> S34F/Y mutation.                                                                                            | <b>22</b> |
| <b>Table S4:</b> Cancer Gene Census genes differentially spliced in the presence of a <i>U2AF1</i> S34F/Y mutation.                                                                                                       | <b>23</b> |
| <b>Table S5:</b> Taqman assays (Life Technologies) used for quantitative RT-PCR of splicing events in <i>CHCHD7</i> , <i>CHEK2</i> , <i>CTNNB1</i> , <i>KARS</i> , and, <i>PTBP1</i> .                                    | <b>24</b> |
| <b>REFERENCES</b>                                                                                                                                                                                                         | <b>25</b> |

## Supporting Figures

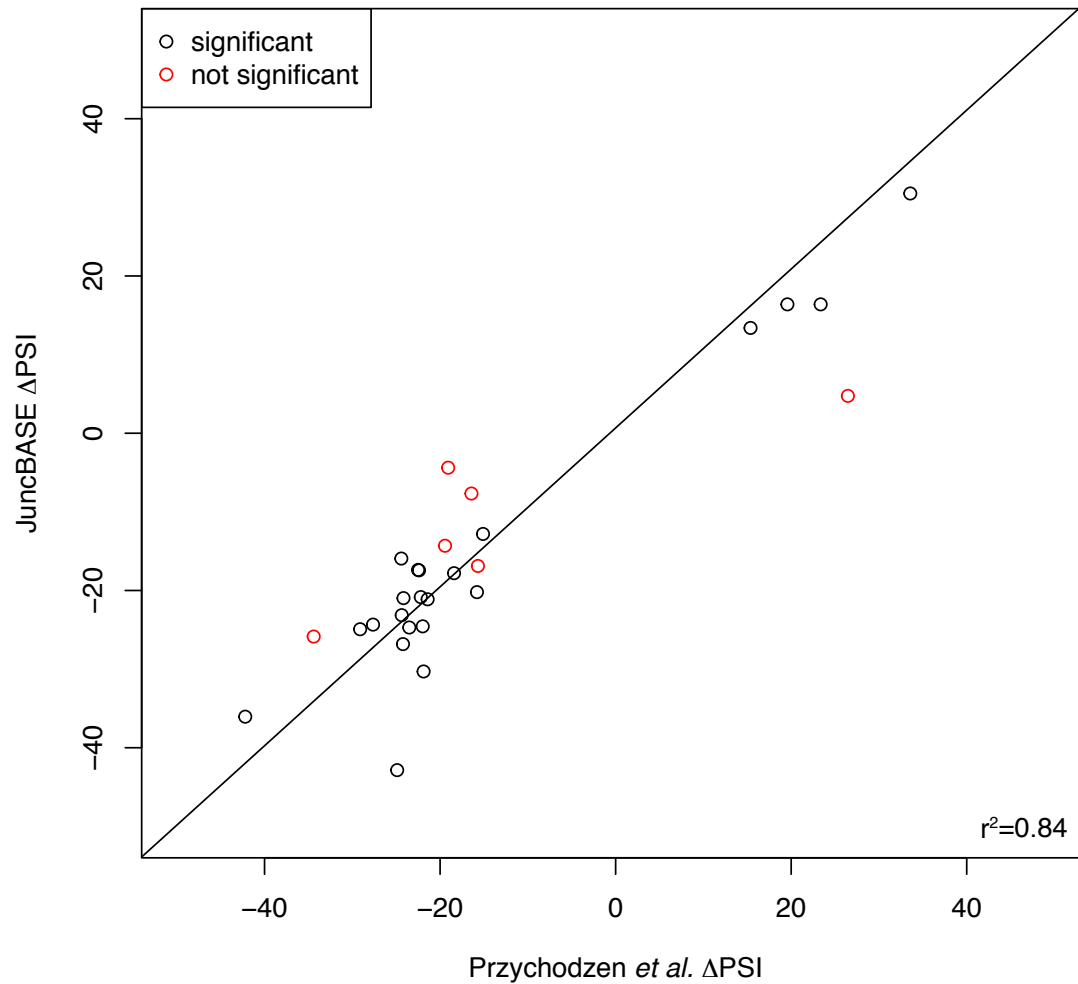

**Figure S1:** Correlation of  $\Delta$ PSI values between JuncBASE and Przychodzen *et al.* [1]

Difference of percent spliced in (PSI) values between AML samples with and without splicing factor mutations were reported in Przychodzen *et al.* and compared to JuncBASE quantified values. Red circles indicate splice events that were quantified, but not significantly associated with *U2AF1* mutation by JuncBASE analysis. Least squares regression line is shown.

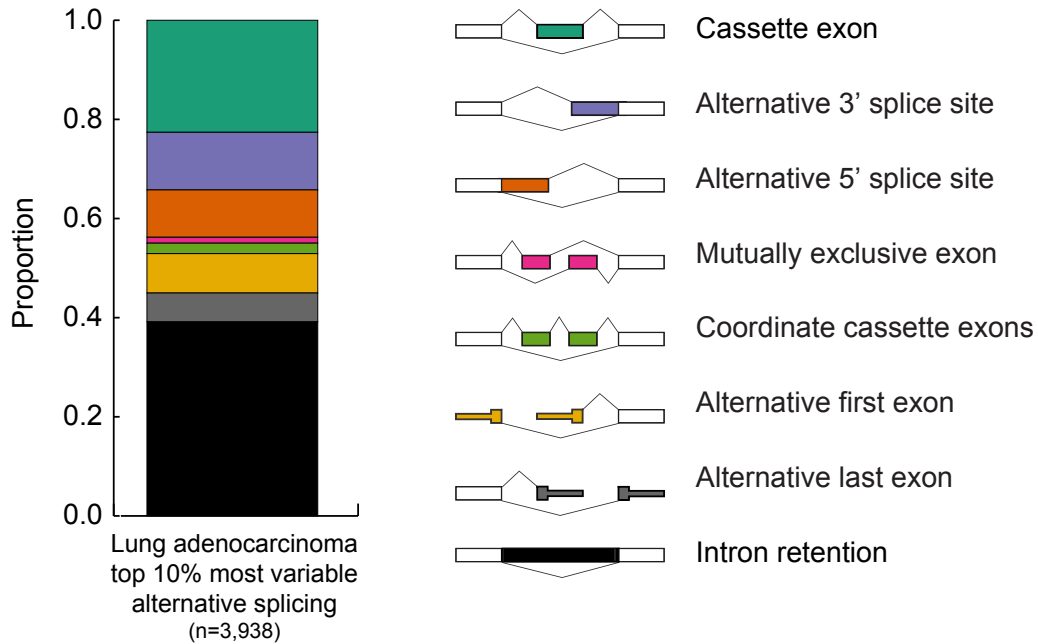

**Figure S2:** Highly variable alternative splicing events in lung adenocarcinoma.

Proportion of alternative splicing events in the top 10% most variable splicing events in lung adenocarcinomas with no mutation in a splicing factor.

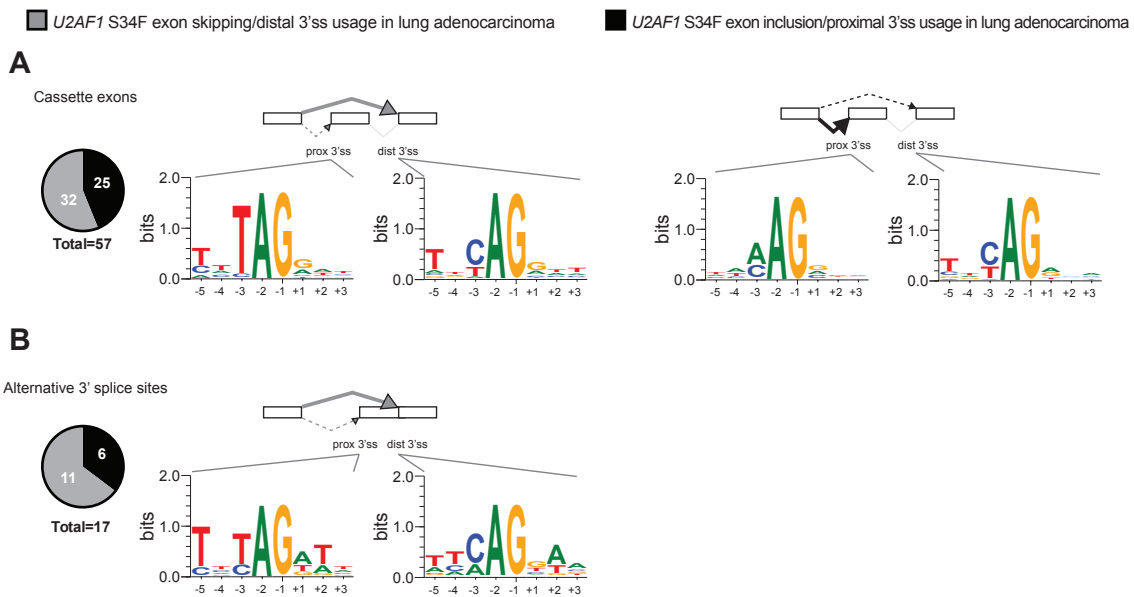

**Figure S3:** Splice site motifs at cassette exon and alternative 3' splice site changes associated with *U2AF1* S34F mutation in lung adenocarcinoma.

(A) Number of cassette exons showing significant skipping or inclusion in *U2AF1* mutated lung adenocarcinomas. Consensus motifs associated with the splice sites are shown. (B) Number of alternative 3' splice site events showing significant skipping or inclusion in *U2AF1* mutated lung adenocarcinomas. Consensus motifs associated with the splice sites are shown. Consensus motifs were only made for cases with 10 or more exon skipping or inclusion events.

*RBM10* LOF exon skipping/distal 3'ss usage in lung adenocarcinoma
  *RBM10* LOF exon inclusion/proximal 3'ss usage in lung adenocarcinoma

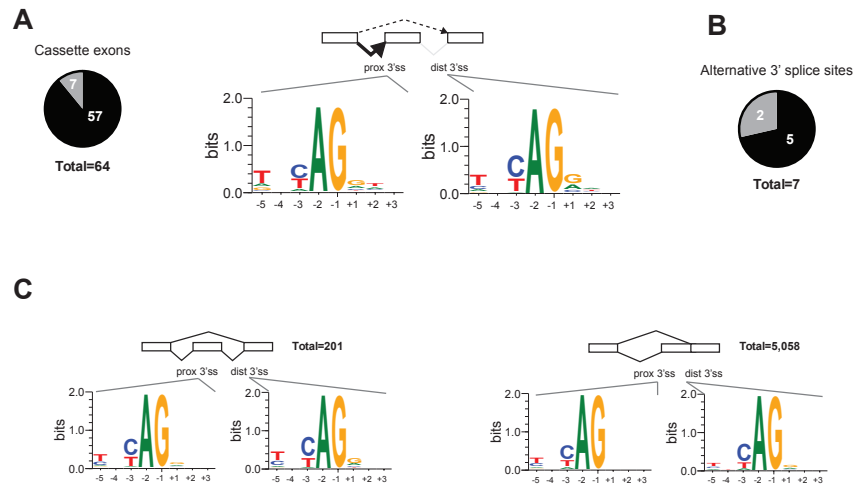

**Figure S4:** Splice site motifs at cassette exon and alternative 3' splice site changes associated with *RBM10* loss-of-function (LOF) mutation in lung adenocarcinoma and control alternative splicing events.

**(A)** Number of cassette exons showing significant skipping or inclusion in *RBM10* LOF lung adenocarcinomas. Consensus motifs associated with the splice sites are shown. **(B)** Number of alternative 3' splice site events showing significant skipping or inclusion in *RBM10* LOF lung adenocarcinomas. Consensus motifs were only made for cases with 10 or more exon skipping or inclusion events. **(C)** Consensus sequence motifs at the proximal and distal 3' splice sites of control alternative splicing events.

■ *U2AF1* S34F induced exon skipping/distal 3'ss usage in HeLa    ■ *U2AF1* S34F induced exon inclusion/proximal 3'ss usage in HeLa

**A**

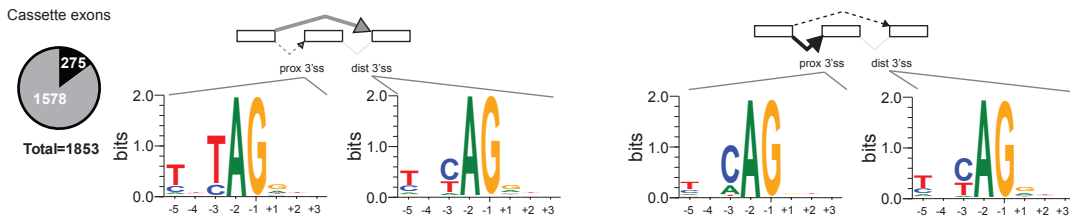

**B**

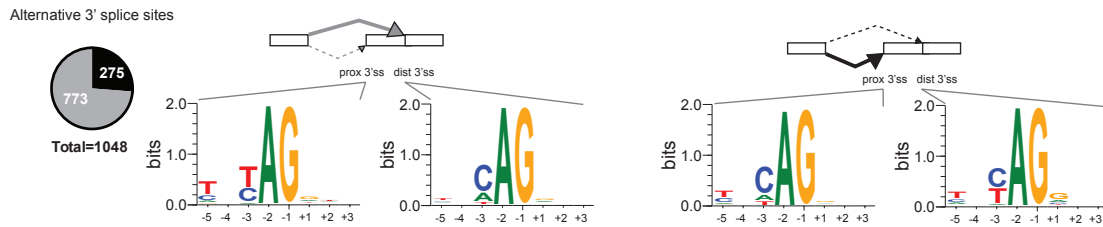

■ *U2AF1* wild-type induced exon skipping/distal 3'ss usage in HeLa

■ *U2AF1* wild-type induced exon inclusion/proximal 3'ss usage in HeLa

**C**

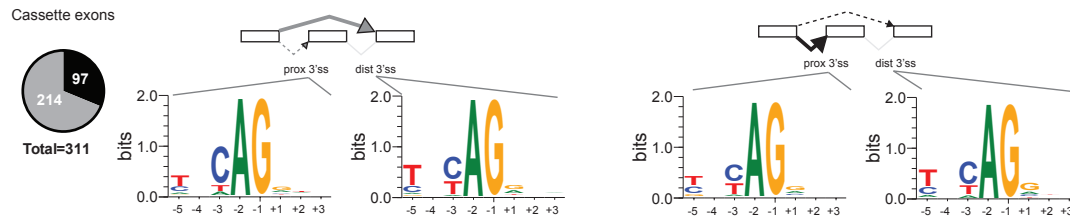

**D**

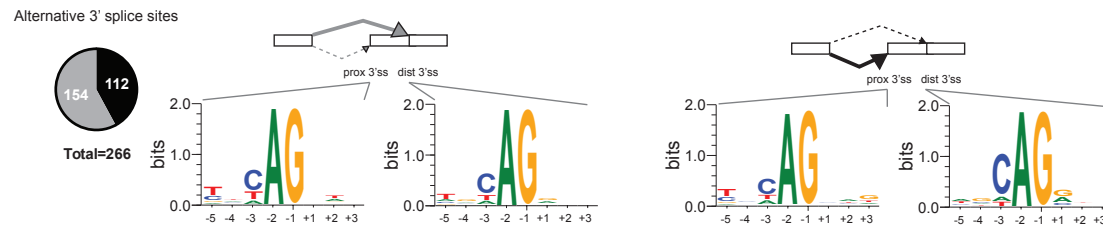

**Figure S5:** Splice site motifs at cassette exon and alternative 3' splice site changes associated with induction of *U2AF1* S34F or *U2AF1* wild-type in HeLa cells.

Number of cassette exons showing significant skipping or inclusion in HeLa cells + induction of (A) *U2AF1* S34F or (C) *U2AF1* wild-type. Number of alternative 3' splice sites showing significant skipping or inclusion in HeLa cells + induction of (B) *U2AF1* S34F or (D) *U2AF1* wild-type. Consensus motifs associated with the splice sites are shown.

**A**

GO:0000278  
mitotic cell cycle

Enrichment score:  
0.582

Normalized enrichment score:  
1.735

Nominal p-value:  
0.038

FDR:  
1

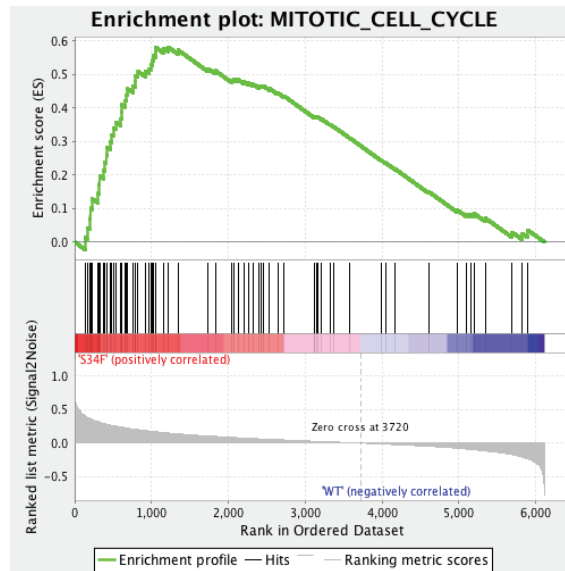

**B**

GO:0000087  
M phase of mitotic cell cycle

Enrichment score:  
0.688

Normalized enrichment score:  
1.679

Nominal p-value:  
0.048

FDR:  
0.968

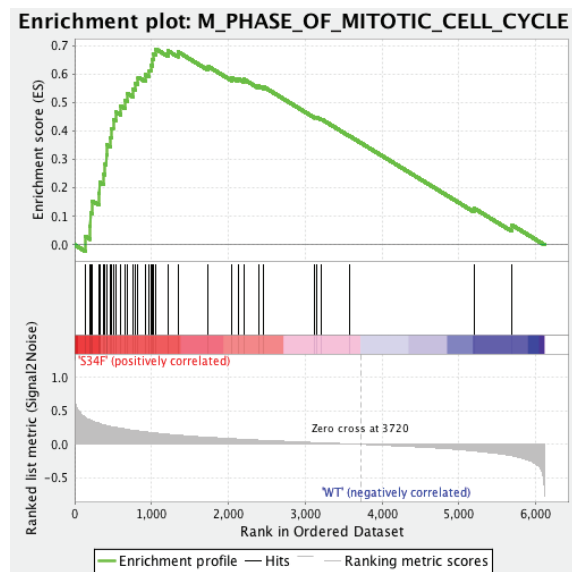

**Figure S6:** GSEA enrichment analysis in AML samples.

(A) GO:0000278 mitotic cell cycle enrichment score. (B) GO:0000087 M phase of mitotic cell cycle enrichment score.



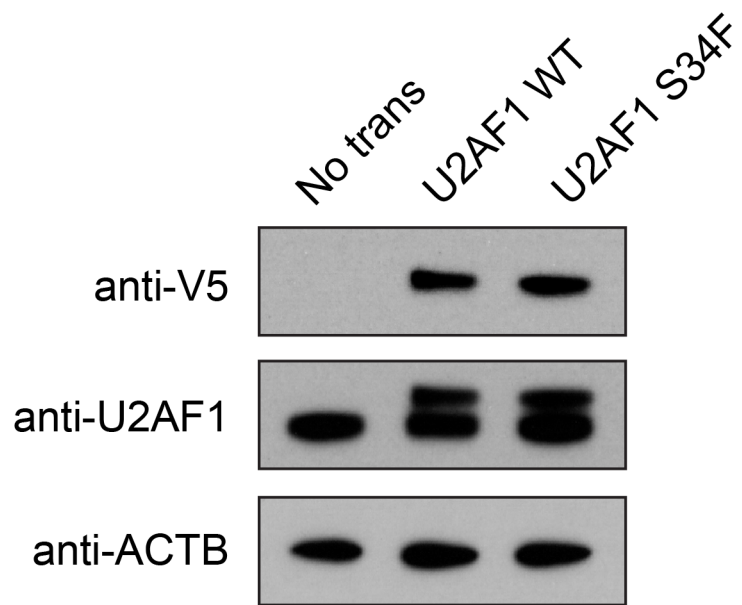

**Figure S7:** Expression of V5 tagged U2AF1 WT or U2AF1 S34F constructs in 293T cells as determined by western blot

## Supporting Tables

**Table S1:** The Cancer Genome Atlas sample identifiers used in this study. Somatic mutations in splicing factors are indicated.

LUAD, lung adenocarcinoma; LAML, acute myeloid leukemia

| TCGA ID      | cancer type | U2AF1  | RBM10          | ZRSR2   | U2AF2   | SF3B1   | PRPF40B | SF1     | SF3A1 | HNRNPK |
|--------------|-------------|--------|----------------|---------|---------|---------|---------|---------|-------|--------|
| TCGA-55-7727 | LUAD        | p.S34F | p.Q416L        | WT      | WT      | WT      | WT      | WT      | WT    | WT     |
| TCGA-64-1680 | LUAD        | p.S34F | WT             | WT      | WT      | WT      | WT      | p.Y450* | WT    | WT     |
| TCGA-49-6744 | LUAD        | p.S34F | WT             | WT      | WT      | WT      | WT      | WT      | WT    | WT     |
| TCGA-55-7903 | LUAD        | p.S34F | WT             | WT      | WT      | WT      | WT      | WT      | WT    | WT     |
| TCGA-50-5941 | LUAD        | p.S34F | WT             | WT      | WT      | WT      | WT      | WT      | WT    | WT     |
| TCGA-78-7145 | LUAD        | p.S34F | WT             | WT      | WT      | WT      | WT      | WT      | WT    | WT     |
| TCGA-49-4505 | LUAD        | p.S34F | WT             | WT      | WT      | WT      | WT      | WT      | WT    | WT     |
| TCGA-49-4488 | LUAD        | p.S34F | WT             | WT      | WT      | WT      | WT      | WT      | WT    | WT     |
| TCGA-55-7815 | LUAD        | WT     | p.D568fs       | WT      | WT      | WT      | WT      | WT      | WT    | WT     |
| TCGA-05-4424 | LUAD        | WT     | p.E177*        | WT      | WT      | WT      | WT      | WT      | WT    | WT     |
| TCGA-05-4418 | LUAD        | WT     | p.E559*        | WT      | WT      | WT      | WT      | WT      | WT    | WT     |
| TCGA-78-7158 | LUAD        | WT     | p.E800*        | WT      | WT      | WT      | WT      | WT      | WT    | WT     |
| TCGA-64-1676 | LUAD        | WT     | p.G153C        | WT      | WT      | p.A959V | WT      | WT      | WT    | WT     |
| TCGA-78-7148 | LUAD        | WT     | p.G168_s plice | WT      | WT      | WT      | WT      | WT      | WT    | WT     |
| TCGA-75-6214 | LUAD        | WT     | p.G168_s plice | WT      | WT      | WT      | WT      | WT      | WT    | WT     |
| TCGA-55-7281 | LUAD        | WT     | p.G870C        | WT      | WT      | WT      | WT      | WT      | WT    | WT     |
| TCGA-64-5775 | LUAD        | WT     | p.P259fs       | WT      | WT      | WT      | WT      | WT      | WT    | WT     |
| TCGA-55-6983 | LUAD        | WT     | p.P567fs       | WT      | WT      | WT      | WT      | WT      | WT    | WT     |
| TCGA-05-4403 | LUAD        | WT     | p.Q155*        | WT      | WT      | WT      | WT      | WT      | WT    | WT     |
| TCGA-49-4494 | LUAD        | WT     | p.Q192_s plice | WT      | WT      | WT      | WT      | WT      | WT    | WT     |
| TCGA-44-7659 | LUAD        | WT     | p.Q674*        | WT      | WT      | WT      | WT      | WT      | WT    | WT     |
| TCGA-78-7537 | LUAD        | WT     | p.R163fs       | WT      | WT      | WT      | WT      | WT      | WT    | WT     |
| TCGA-73-7498 | LUAD        | WT     | p.R387_s plice | WT      | WT      | WT      | WT      | WT      | WT    | WT     |
| TCGA-69-7764 | LUAD        | WT     | p.S781S        | WT      | WT      | WT      | WT      | WT      | WT    | WT     |
| TCGA-35-3615 | LUAD        | WT     | p.T185fs       | WT      | WT      | WT      | WT      | WT      | WT    | WT     |
| TCGA-05-4395 | LUAD        | WT     | p.W658Y        | WT      | WT      | WT      | WT      | WT      | WT    | WT     |
| TCGA-78-7166 | LUAD        | WT     | p.Y16fs        | WT      | WT      | WT      | WT      | WT      | WT    | WT     |
| TCGA-97-7938 | LUAD        | WT     | WT             | p.A342S | WT      | WT      | WT      | WT      | WT    | WT     |
| TCGA-75-6211 | LUAD        | WT     | WT             | WT      | p.A131S | WT      | WT      | WT      | WT    | WT     |
| TCGA-55-6543 | LUAD        | WT     | WT             | WT      | p.F4Y   | WT      | WT      | WT      | WT    | WT     |
| TCGA-38-4627 | LUAD        | WT     | WT             | WT      | p.G176E | WT      | WT      | WT      | WT    | WT     |

|              |      |         |    |    |         |         |         |         |         |          |
|--------------|------|---------|----|----|---------|---------|---------|---------|---------|----------|
| TCGA-50-5933 | LUAD | WT      | WT | WT | p.G176V | WT      | WT      | WT      | WT      | WT       |
| TCGA-69-7980 | LUAD | WT      | WT | WT | p.I263I | WT      | WT      | WT      | WT      | WT       |
| TCGA-97-7554 | LUAD | WT      | WT | WT | p.P361P | WT      | p.R410L | WT      | WT      | WT       |
| TCGA-67-3772 | LUAD | WT      | WT | WT | p.P95fs | WT      | WT      | WT      | WT      | WT       |
| TCGA-55-7574 | LUAD | WT      | WT | WT | p.V291V | WT      | WT      | WT      | WT      | WT       |
| TCGA-44-6774 | LUAD | WT      | WT | WT | WT      | p.A899S | WT      | WT      | WT      | WT       |
| TCGA-99-7458 | LUAD | WT      | WT | WT | WT      | p.G237G | WT      | WT      | WT      | WT       |
| TCGA-44-2659 | LUAD | WT      | WT | WT | WT      | p.K741N | WT      | WT      | WT      | WT       |
| TCGA-50-5936 | LUAD | WT      | WT | WT | WT      | p.P279S | WT      | WT      | WT      | WT       |
| TCGA-49-4487 | LUAD | WT      | WT | WT | WT      | p.R292K | WT      | WT      | WT      | WT       |
| TCGA-91-7771 | LUAD | WT      | WT | WT | WT      | WT      | p.R365S | WT      | WT      | WT       |
| TCGA-64-5778 | LUAD | WT      | WT | WT | WT      | WT      | p.S766F | WT      | WT      | WT       |
| TCGA-50-6597 | LUAD | WT      | WT | WT | WT      | WT      | WT      | p.A551A | WT      | WT       |
| TCGA-38-4631 | LUAD | WT      | WT | WT | WT      | WT      | WT      | p.N120S | WT      | WT       |
| TCGA-05-4422 | LUAD | WT      | WT | WT | WT      | WT      | WT      | p.P444S | WT      | WT       |
| TCGA-38-4632 | LUAD | WT      | WT | WT | WT      | WT      | WT      | p.S268L | WT      | WT       |
| TCGA-78-7539 | LUAD | WT      | WT | WT | WT      | WT      | WT      | WT      | p.D196G | WT       |
| TCGA-97-7546 | LUAD | WT      | WT | WT | WT      | WT      | WT      | WT      | p.E340* | WT       |
| TCGA-05-4417 | LUAD | WT      | WT | WT | WT      | WT      | WT      | WT      | p.G489C | WT       |
| TCGA-86-6851 | LUAD | WT      | WT | WT | WT      | WT      | WT      | WT      | p.P414H | WT       |
| TCGA-44-7670 | LUAD | WT      | WT | WT | WT      | WT      | WT      | WT      | p.S227* | WT       |
| TCGA-05-4390 | LUAD | WT      | WT | WT | WT      | WT      | WT      | WT      | p.Y271C | WT       |
| TCGA-55-1592 | LUAD | WT      | WT | WT | WT      | WT      | WT      | WT      | WT      | p.Q31R   |
| TCGA-55-6982 | LUAD | WT      | WT | WT | WT      | WT      | WT      | WT      | WT      | p.R221H  |
| TCGA-05-4249 | LUAD | WT      | WT | WT | WT      | WT      | WT      | WT      | WT      | c.-38A>G |
| TCGA-AB-2821 | LAML | p.Q157P | WT | WT | WT      | WT      | WT      | WT      | WT      | WT       |
| TCGA-AB-2996 | LAML | p.S34F  | WT | WT | WT      | WT      | WT      | WT      | WT      | WT       |
| TCGA-AB-2847 | LAML | p.S34F  | WT | WT | WT      | WT      | WT      | WT      | WT      | WT       |
| TCGA-AB-2843 | LAML | p.S34F  | WT | WT | WT      | WT      | WT      | WT      | WT      | WT       |
| TCGA-AB-2912 | LAML | p.S34F  | WT | WT | WT      | WT      | WT      | WT      | WT      | WT       |
| TCGA-AB-2882 | LAML | p.S34Y  | WT | WT | WT      | WT      | WT      | WT      | WT      | WT       |
| TCGA-AB-2861 | LAML | p.S34Y  | WT | WT | WT      | WT      | WT      | WT      | WT      | WT       |
| TCGA-AB-2851 | LAML | WT      | WT | WT | p.L14fs | WT      | WT      | WT      | WT      | WT       |
| TCGA-AB-2929 | LAML | WT      | WT | WT | WT      | p.K700E | WT      | WT      | WT      | WT       |
| TCGA-AB-2859 | LAML | WT      | WT | WT | WT      | WT      | WT      | WT      | WT      | p.L68fs  |
| TCGA-AB-2937 | LAML | WT      | WT | WT | WT      | WT      | WT      | WT      | WT      | p.N72fs  |
| TCGA-05-4382 | LUAD | WT      | WT | WT | WT      | WT      | WT      | WT      | WT      | WT       |
| TCGA-05-4384 | LUAD | WT      | WT | WT | WT      | WT      | WT      | WT      | WT      | WT       |
| TCGA-05-4389 | LUAD | WT      | WT | WT | WT      | WT      | WT      | WT      | WT      | WT       |

|              |      |    |    |    |    |    |    |    |    |    |
|--------------|------|----|----|----|----|----|----|----|----|----|
| TCGA-05-4396 | LUAD | WT | WT | WT | WT | WT | WT | WT | WT | WT |
| TCGA-05-4398 | LUAD | WT | WT | WT | WT | WT | WT | WT | WT | WT |
| TCGA-05-4402 | LUAD | WT | WT | WT | WT | WT | WT | WT | WT | WT |
| TCGA-05-4405 | LUAD | WT | WT | WT | WT | WT | WT | WT | WT | WT |
| TCGA-05-4410 | LUAD | WT | WT | WT | WT | WT | WT | WT | WT | WT |
| TCGA-05-4415 | LUAD | WT | WT | WT | WT | WT | WT | WT | WT | WT |
| TCGA-05-4420 | LUAD | WT | WT | WT | WT | WT | WT | WT | WT | WT |
| TCGA-05-4425 | LUAD | WT | WT | WT | WT | WT | WT | WT | WT | WT |
| TCGA-05-4426 | LUAD | WT | WT | WT | WT | WT | WT | WT | WT | WT |
| TCGA-05-4430 | LUAD | WT | WT | WT | WT | WT | WT | WT | WT | WT |
| TCGA-05-4432 | LUAD | WT | WT | WT | WT | WT | WT | WT | WT | WT |
| TCGA-05-4433 | LUAD | WT | WT | WT | WT | WT | WT | WT | WT | WT |
| TCGA-05-5420 | LUAD | WT | WT | WT | WT | WT | WT | WT | WT | WT |
| TCGA-05-5423 | LUAD | WT | WT | WT | WT | WT | WT | WT | WT | WT |
| TCGA-05-5428 | LUAD | WT | WT | WT | WT | WT | WT | WT | WT | WT |
| TCGA-05-5429 | LUAD | WT | WT | WT | WT | WT | WT | WT | WT | WT |
| TCGA-05-5715 | LUAD | WT | WT | WT | WT | WT | WT | WT | WT | WT |
| TCGA-38-4626 | LUAD | WT | WT | WT | WT | WT | WT | WT | WT | WT |
| TCGA-38-4628 | LUAD | WT | WT | WT | WT | WT | WT | WT | WT | WT |
| TCGA-38-6178 | LUAD | WT | WT | WT | WT | WT | WT | WT | WT | WT |
| TCGA-44-2655 | LUAD | WT | WT | WT | WT | WT | WT | WT | WT | WT |
| TCGA-44-2656 | LUAD | WT | WT | WT | WT | WT | WT | WT | WT | WT |
| TCGA-44-2657 | LUAD | WT | WT | WT | WT | WT | WT | WT | WT | WT |
| TCGA-44-2661 | LUAD | WT | WT | WT | WT | WT | WT | WT | WT | WT |
| TCGA-44-2662 | LUAD | WT | WT | WT | WT | WT | WT | WT | WT | WT |
| TCGA-44-2665 | LUAD | WT | WT | WT | WT | WT | WT | WT | WT | WT |
| TCGA-44-2666 | LUAD | WT | WT | WT | WT | WT | WT | WT | WT | WT |
| TCGA-44-3396 | LUAD | WT | WT | WT | WT | WT | WT | WT | WT | WT |
| TCGA-44-3919 | LUAD | WT | WT | WT | WT | WT | WT | WT | WT | WT |
| TCGA-44-4112 | LUAD | WT | WT | WT | WT | WT | WT | WT | WT | WT |
| TCGA-44-5645 | LUAD | WT | WT | WT | WT | WT | WT | WT | WT | WT |
| TCGA-44-6145 | LUAD | WT | WT | WT | WT | WT | WT | WT | WT | WT |
| TCGA-44-6146 | LUAD | WT | WT | WT | WT | WT | WT | WT | WT | WT |
| TCGA-44-6147 | LUAD | WT | WT | WT | WT | WT | WT | WT | WT | WT |
| TCGA-44-6775 | LUAD | WT | WT | WT | WT | WT | WT | WT | WT | WT |
| TCGA-44-6776 | LUAD | WT | WT | WT | WT | WT | WT | WT | WT | WT |
| TCGA-44-6777 | LUAD | WT | WT | WT | WT | WT | WT | WT | WT | WT |
| TCGA-44-6779 | LUAD | WT | WT | WT | WT | WT | WT | WT | WT | WT |
| TCGA-44-7662 | LUAD | WT | WT | WT | WT | WT | WT | WT | WT | WT |

|              |      |    |    |    |    |    |    |    |    |    |
|--------------|------|----|----|----|----|----|----|----|----|----|
| TCGA-44-7671 | LUAD | WT | WT | WT | WT | WT | WT | WT | WT | WT |
| TCGA-44-7672 | LUAD | WT | WT | WT | WT | WT | WT | WT | WT | WT |
| TCGA-49-4486 | LUAD | WT | WT | WT | WT | WT | WT | WT | WT | WT |
| TCGA-49-4490 | LUAD | WT | WT | WT | WT | WT | WT | WT | WT | WT |
| TCGA-49-4501 | LUAD | WT | WT | WT | WT | WT | WT | WT | WT | WT |
| TCGA-49-4506 | LUAD | WT | WT | WT | WT | WT | WT | WT | WT | WT |
| TCGA-49-4507 | LUAD | WT | WT | WT | WT | WT | WT | WT | WT | WT |
| TCGA-49-4510 | LUAD | WT | WT | WT | WT | WT | WT | WT | WT | WT |
| TCGA-49-4512 | LUAD | WT | WT | WT | WT | WT | WT | WT | WT | WT |
| TCGA-49-4514 | LUAD | WT | WT | WT | WT | WT | WT | WT | WT | WT |
| TCGA-49-6742 | LUAD | WT | WT | WT | WT | WT | WT | WT | WT | WT |
| TCGA-49-6745 | LUAD | WT | WT | WT | WT | WT | WT | WT | WT | WT |
| TCGA-49-6761 | LUAD | WT | WT | WT | WT | WT | WT | WT | WT | WT |
| TCGA-49-6767 | LUAD | WT | WT | WT | WT | WT | WT | WT | WT | WT |
| TCGA-50-5044 | LUAD | WT | WT | WT | WT | WT | WT | WT | WT | WT |
| TCGA-50-5049 | LUAD | WT | WT | WT | WT | WT | WT | WT | WT | WT |
| TCGA-50-5051 | LUAD | WT | WT | WT | WT | WT | WT | WT | WT | WT |
| TCGA-50-5055 | LUAD | WT | WT | WT | WT | WT | WT | WT | WT | WT |
| TCGA-50-5068 | LUAD | WT | WT | WT | WT | WT | WT | WT | WT | WT |
| TCGA-50-5072 | LUAD | WT | WT | WT | WT | WT | WT | WT | WT | WT |
| TCGA-50-5931 | LUAD | WT | WT | WT | WT | WT | WT | WT | WT | WT |
| TCGA-50-5932 | LUAD | WT | WT | WT | WT | WT | WT | WT | WT | WT |
| TCGA-50-5935 | LUAD | WT | WT | WT | WT | WT | WT | WT | WT | WT |
| TCGA-50-5939 | LUAD | WT | WT | WT | WT | WT | WT | WT | WT | WT |
| TCGA-50-5942 | LUAD | WT | WT | WT | WT | WT | WT | WT | WT | WT |
| TCGA-50-5944 | LUAD | WT | WT | WT | WT | WT | WT | WT | WT | WT |
| TCGA-50-6593 | LUAD | WT | WT | WT | WT | WT | WT | WT | WT | WT |
| TCGA-50-6595 | LUAD | WT | WT | WT | WT | WT | WT | WT | WT | WT |
| TCGA-50-6673 | LUAD | WT | WT | WT | WT | WT | WT | WT | WT | WT |
| TCGA-50-7109 | LUAD | WT | WT | WT | WT | WT | WT | WT | WT | WT |
| TCGA-53-7626 | LUAD | WT | WT | WT | WT | WT | WT | WT | WT | WT |
| TCGA-53-7813 | LUAD | WT | WT | WT | WT | WT | WT | WT | WT | WT |
| TCGA-55-1594 | LUAD | WT | WT | WT | WT | WT | WT | WT | WT | WT |
| TCGA-55-1596 | LUAD | WT | WT | WT | WT | WT | WT | WT | WT | WT |
| TCGA-55-6642 | LUAD | WT | WT | WT | WT | WT | WT | WT | WT | WT |
| TCGA-55-6712 | LUAD | WT | WT | WT | WT | WT | WT | WT | WT | WT |
| TCGA-55-6970 | LUAD | WT | WT | WT | WT | WT | WT | WT | WT | WT |
| TCGA-55-6971 | LUAD | WT | WT | WT | WT | WT | WT | WT | WT | WT |
| TCGA-55-6972 | LUAD | WT | WT | WT | WT | WT | WT | WT | WT | WT |

|              |      |    |    |    |    |    |    |    |    |    |
|--------------|------|----|----|----|----|----|----|----|----|----|
| TCGA-55-6978 | LUAD | WT | WT | WT | WT | WT | WT | WT | WT | WT |
| TCGA-55-6979 | LUAD | WT | WT | WT | WT | WT | WT | WT | WT | WT |
| TCGA-55-6980 | LUAD | WT | WT | WT | WT | WT | WT | WT | WT | WT |
| TCGA-55-6981 | LUAD | WT | WT | WT | WT | WT | WT | WT | WT | WT |
| TCGA-55-6985 | LUAD | WT | WT | WT | WT | WT | WT | WT | WT | WT |
| TCGA-55-6986 | LUAD | WT | WT | WT | WT | WT | WT | WT | WT | WT |
| TCGA-55-7283 | LUAD | WT | WT | WT | WT | WT | WT | WT | WT | WT |
| TCGA-55-7573 | LUAD | WT | WT | WT | WT | WT | WT | WT | WT | WT |
| TCGA-55-7576 | LUAD | WT | WT | WT | WT | WT | WT | WT | WT | WT |
| TCGA-55-7724 | LUAD | WT | WT | WT | WT | WT | WT | WT | WT | WT |
| TCGA-55-7725 | LUAD | WT | WT | WT | WT | WT | WT | WT | WT | WT |
| TCGA-55-7726 | LUAD | WT | WT | WT | WT | WT | WT | WT | WT | WT |
| TCGA-55-7728 | LUAD | WT | WT | WT | WT | WT | WT | WT | WT | WT |
| TCGA-55-7907 | LUAD | WT | WT | WT | WT | WT | WT | WT | WT | WT |
| TCGA-55-7911 | LUAD | WT | WT | WT | WT | WT | WT | WT | WT | WT |
| TCGA-55-7914 | LUAD | WT | WT | WT | WT | WT | WT | WT | WT | WT |
| TCGA-64-1677 | LUAD | WT | WT | WT | WT | WT | WT | WT | WT | WT |
| TCGA-64-1678 | LUAD | WT | WT | WT | WT | WT | WT | WT | WT | WT |
| TCGA-64-1679 | LUAD | WT | WT | WT | WT | WT | WT | WT | WT | WT |
| TCGA-64-1681 | LUAD | WT | WT | WT | WT | WT | WT | WT | WT | WT |
| TCGA-64-5774 | LUAD | WT | WT | WT | WT | WT | WT | WT | WT | WT |
| TCGA-64-5781 | LUAD | WT | WT | WT | WT | WT | WT | WT | WT | WT |
| TCGA-67-3771 | LUAD | WT | WT | WT | WT | WT | WT | WT | WT | WT |
| TCGA-67-3773 | LUAD | WT | WT | WT | WT | WT | WT | WT | WT | WT |
| TCGA-67-3774 | LUAD | WT | WT | WT | WT | WT | WT | WT | WT | WT |
| TCGA-67-6215 | LUAD | WT | WT | WT | WT | WT | WT | WT | WT | WT |
| TCGA-67-6216 | LUAD | WT | WT | WT | WT | WT | WT | WT | WT | WT |
| TCGA-67-6217 | LUAD | WT | WT | WT | WT | WT | WT | WT | WT | WT |
| TCGA-69-7760 | LUAD | WT | WT | WT | WT | WT | WT | WT | WT | WT |
| TCGA-69-7761 | LUAD | WT | WT | WT | WT | WT | WT | WT | WT | WT |
| TCGA-69-7763 | LUAD | WT | WT | WT | WT | WT | WT | WT | WT | WT |
| TCGA-69-7765 | LUAD | WT | WT | WT | WT | WT | WT | WT | WT | WT |
| TCGA-71-6725 | LUAD | WT | WT | WT | WT | WT | WT | WT | WT | WT |
| TCGA-73-4658 | LUAD | WT | WT | WT | WT | WT | WT | WT | WT | WT |
| TCGA-73-4659 | LUAD | WT | WT | WT | WT | WT | WT | WT | WT | WT |
| TCGA-73-4662 | LUAD | WT | WT | WT | WT | WT | WT | WT | WT | WT |
| TCGA-73-4675 | LUAD | WT | WT | WT | WT | WT | WT | WT | WT | WT |
| TCGA-73-4676 | LUAD | WT | WT | WT | WT | WT | WT | WT | WT | WT |
| TCGA-73-7499 | LUAD | WT | WT | WT | WT | WT | WT | WT | WT | WT |

|              |      |    |    |    |    |    |    |    |    |    |
|--------------|------|----|----|----|----|----|----|----|----|----|
| TCGA-75-5122 | LUAD | WT | WT | WT | WT | WT | WT | WT | WT | WT |
| TCGA-75-5126 | LUAD | WT | WT | WT | WT | WT | WT | WT | WT | WT |
| TCGA-75-5146 | LUAD | WT | WT | WT | WT | WT | WT | WT | WT | WT |
| TCGA-75-5147 | LUAD | WT | WT | WT | WT | WT | WT | WT | WT | WT |
| TCGA-75-6203 | LUAD | WT | WT | WT | WT | WT | WT | WT | WT | WT |
| TCGA-75-6205 | LUAD | WT | WT | WT | WT | WT | WT | WT | WT | WT |
| TCGA-75-6207 | LUAD | WT | WT | WT | WT | WT | WT | WT | WT | WT |
| TCGA-75-6212 | LUAD | WT | WT | WT | WT | WT | WT | WT | WT | WT |
| TCGA-75-7025 | LUAD | WT | WT | WT | WT | WT | WT | WT | WT | WT |
| TCGA-75-7027 | LUAD | WT | WT | WT | WT | WT | WT | WT | WT | WT |
| TCGA-75-7030 | LUAD | WT | WT | WT | WT | WT | WT | WT | WT | WT |
| TCGA-75-7031 | LUAD | WT | WT | WT | WT | WT | WT | WT | WT | WT |
| TCGA-78-7143 | LUAD | WT | WT | WT | WT | WT | WT | WT | WT | WT |
| TCGA-78-7147 | LUAD | WT | WT | WT | WT | WT | WT | WT | WT | WT |
| TCGA-78-7149 | LUAD | WT | WT | WT | WT | WT | WT | WT | WT | WT |
| TCGA-78-7150 | LUAD | WT | WT | WT | WT | WT | WT | WT | WT | WT |
| TCGA-78-7152 | LUAD | WT | WT | WT | WT | WT | WT | WT | WT | WT |
| TCGA-78-7153 | LUAD | WT | WT | WT | WT | WT | WT | WT | WT | WT |
| TCGA-78-7154 | LUAD | WT | WT | WT | WT | WT | WT | WT | WT | WT |
| TCGA-78-7155 | LUAD | WT | WT | WT | WT | WT | WT | WT | WT | WT |
| TCGA-78-7156 | LUAD | WT | WT | WT | WT | WT | WT | WT | WT | WT |
| TCGA-78-7159 | LUAD | WT | WT | WT | WT | WT | WT | WT | WT | WT |
| TCGA-78-7160 | LUAD | WT | WT | WT | WT | WT | WT | WT | WT | WT |
| TCGA-78-7161 | LUAD | WT | WT | WT | WT | WT | WT | WT | WT | WT |
| TCGA-78-7162 | LUAD | WT | WT | WT | WT | WT | WT | WT | WT | WT |
| TCGA-78-7163 | LUAD | WT | WT | WT | WT | WT | WT | WT | WT | WT |
| TCGA-78-7167 | LUAD | WT | WT | WT | WT | WT | WT | WT | WT | WT |
| TCGA-78-7535 | LUAD | WT | WT | WT | WT | WT | WT | WT | WT | WT |
| TCGA-78-7536 | LUAD | WT | WT | WT | WT | WT | WT | WT | WT | WT |
| TCGA-78-7540 | LUAD | WT | WT | WT | WT | WT | WT | WT | WT | WT |
| TCGA-78-7542 | LUAD | WT | WT | WT | WT | WT | WT | WT | WT | WT |
| TCGA-78-7633 | LUAD | WT | WT | WT | WT | WT | WT | WT | WT | WT |
| TCGA-80-5607 | LUAD | WT | WT | WT | WT | WT | WT | WT | WT | WT |
| TCGA-80-5608 | LUAD | WT | WT | WT | WT | WT | WT | WT | WT | WT |
| TCGA-86-6562 | LUAD | WT | WT | WT | WT | WT | WT | WT | WT | WT |
| TCGA-86-7713 | LUAD | WT | WT | WT | WT | WT | WT | WT | WT | WT |
| TCGA-86-7714 | LUAD | WT | WT | WT | WT | WT | WT | WT | WT | WT |
| TCGA-91-6828 | LUAD | WT | WT | WT | WT | WT | WT | WT | WT | WT |
| TCGA-91-6829 | LUAD | WT | WT | WT | WT | WT | WT | WT | WT | WT |

|              |      |    |    |    |    |    |    |    |    |    |
|--------------|------|----|----|----|----|----|----|----|----|----|
| TCGA-91-6835 | LUAD | WT | WT | WT | WT | WT | WT | WT | WT | WT |
| TCGA-91-6840 | LUAD | WT | WT | WT | WT | WT | WT | WT | WT | WT |
| TCGA-91-6847 | LUAD | WT | WT | WT | WT | WT | WT | WT | WT | WT |
| TCGA-91-6849 | LUAD | WT | WT | WT | WT | WT | WT | WT | WT | WT |
| TCGA-93-7347 | LUAD | WT | WT | WT | WT | WT | WT | WT | WT | WT |
| TCGA-93-7348 | LUAD | WT | WT | WT | WT | WT | WT | WT | WT | WT |
| TCGA-95-7039 | LUAD | WT | WT | WT | WT | WT | WT | WT | WT | WT |
| TCGA-95-7043 | LUAD | WT | WT | WT | WT | WT | WT | WT | WT | WT |
| TCGA-95-7567 | LUAD | WT | WT | WT | WT | WT | WT | WT | WT | WT |
| TCGA-95-7947 | LUAD | WT | WT | WT | WT | WT | WT | WT | WT | WT |
| TCGA-95-7948 | LUAD | WT | WT | WT | WT | WT | WT | WT | WT | WT |
| TCGA-97-7552 | LUAD | WT | WT | WT | WT | WT | WT | WT | WT | WT |
| TCGA-97-7553 | LUAD | WT | WT | WT | WT | WT | WT | WT | WT | WT |
| TCGA-97-7937 | LUAD | WT | WT | WT | WT | WT | WT | WT | WT | WT |
| TCGA-97-7941 | LUAD | WT | WT | WT | WT | WT | WT | WT | WT | WT |
| TCGA-AB-2866 | LAML | WT | WT | WT | WT | WT | WT | WT | WT | WT |
| TCGA-AB-2899 | LAML | WT | WT | WT | WT | WT | WT | WT | WT | WT |
| TCGA-AB-2897 | LAML | WT | WT | WT | WT | WT | WT | WT | WT | WT |
| TCGA-AB-2904 | LAML | WT | WT | WT | WT | WT | WT | WT | WT | WT |
| TCGA-AB-2871 | LAML | WT | WT | WT | WT | WT | WT | WT | WT | WT |
| TCGA-AB-2856 | LAML | WT | WT | WT | WT | WT | WT | WT | WT | WT |
| TCGA-AB-2819 | LAML | WT | WT | WT | WT | WT | WT | WT | WT | WT |
| TCGA-AB-2985 | LAML | WT | WT | WT | WT | WT | WT | WT | WT | WT |
| TCGA-AB-2828 | LAML | WT | WT | WT | WT | WT | WT | WT | WT | WT |
| TCGA-AB-2982 | LAML | WT | WT | WT | WT | WT | WT | WT | WT | WT |
| TCGA-AB-2816 | LAML | WT | WT | WT | WT | WT | WT | WT | WT | WT |
| TCGA-AB-2976 | LAML | WT | WT | WT | WT | WT | WT | WT | WT | WT |
| TCGA-AB-2908 | LAML | WT | WT | WT | WT | WT | WT | WT | WT | WT |
| TCGA-AB-2885 | LAML | WT | WT | WT | WT | WT | WT | WT | WT | WT |
| TCGA-AB-2886 | LAML | WT | WT | WT | WT | WT | WT | WT | WT | WT |
| TCGA-AB-2994 | LAML | WT | WT | WT | WT | WT | WT | WT | WT | WT |
| TCGA-AB-2824 | LAML | WT | WT | WT | WT | WT | WT | WT | WT | WT |
| TCGA-AB-2920 | LAML | WT | WT | WT | WT | WT | WT | WT | WT | WT |
| TCGA-AB-2837 | LAML | WT | WT | WT | WT | WT | WT | WT | WT | WT |
| TCGA-AB-2978 | LAML | WT | WT | WT | WT | WT | WT | WT | WT | WT |
| TCGA-AB-2879 | LAML | WT | WT | WT | WT | WT | WT | WT | WT | WT |
| TCGA-AB-2931 | LAML | WT | WT | WT | WT | WT | WT | WT | WT | WT |
| TCGA-AB-2932 | LAML | WT | WT | WT | WT | WT | WT | WT | WT | WT |
| TCGA-AB-2844 | LAML | WT | WT | WT | WT | WT | WT | WT | WT | WT |



|              |      |    |    |    |    |    |    |    |    |    |
|--------------|------|----|----|----|----|----|----|----|----|----|
| TCGA-AB-2872 | LAML | WT | WT | WT | WT | WT | WT | WT | WT | WT |
| TCGA-AB-2839 | LAML | WT | WT | WT | WT | WT | WT | WT | WT | WT |
| TCGA-AB-2948 | LAML | WT | WT | WT | WT | WT | WT | WT | WT | WT |
| TCGA-AB-3011 | LAML | WT | WT | WT | WT | WT | WT | WT | WT | WT |
| TCGA-AB-2956 | LAML | WT | WT | WT | WT | WT | WT | WT | WT | WT |
| TCGA-AB-2817 | LAML | WT | WT | WT | WT | WT | WT | WT | WT | WT |
| TCGA-AB-2806 | LAML | WT | WT | WT | WT | WT | WT | WT | WT | WT |
| TCGA-AB-2823 | LAML | WT | WT | WT | WT | WT | WT | WT | WT | WT |
| TCGA-AB-2973 | LAML | WT | WT | WT | WT | WT | WT | WT | WT | WT |
| TCGA-AB-2930 | LAML | WT | WT | WT | WT | WT | WT | WT | WT | WT |
| TCGA-AB-2896 | LAML | WT | WT | WT | WT | WT | WT | WT | WT | WT |
| TCGA-AB-2895 | LAML | WT | WT | WT | WT | WT | WT | WT | WT | WT |
| TCGA-AB-2942 | LAML | WT | WT | WT | WT | WT | WT | WT | WT | WT |
| TCGA-AB-2928 | LAML | WT | WT | WT | WT | WT | WT | WT | WT | WT |
| TCGA-AB-2833 | LAML | WT | WT | WT | WT | WT | WT | WT | WT | WT |
| TCGA-AB-2983 | LAML | WT | WT | WT | WT | WT | WT | WT | WT | WT |
| TCGA-AB-2835 | LAML | WT | WT | WT | WT | WT | WT | WT | WT | WT |
| TCGA-AB-2836 | LAML | WT | WT | WT | WT | WT | WT | WT | WT | WT |
| TCGA-AB-2841 | LAML | WT | WT | WT | WT | WT | WT | WT | WT | WT |
| TCGA-AB-2842 | LAML | WT | WT | WT | WT | WT | WT | WT | WT | WT |
| TCGA-AB-2870 | LAML | WT | WT | WT | WT | WT | WT | WT | WT | WT |
| TCGA-AB-2936 | LAML | WT | WT | WT | WT | WT | WT | WT | WT | WT |
| TCGA-AB-3007 | LAML | WT | WT | WT | WT | WT | WT | WT | WT | WT |
| TCGA-AB-3001 | LAML | WT | WT | WT | WT | WT | WT | WT | WT | WT |
| TCGA-AB-3000 | LAML | WT | WT | WT | WT | WT | WT | WT | WT | WT |
| TCGA-AB-2941 | LAML | WT | WT | WT | WT | WT | WT | WT | WT | WT |
| TCGA-AB-2939 | LAML | WT | WT | WT | WT | WT | WT | WT | WT | WT |
| TCGA-AB-2815 | LAML | WT | WT | WT | WT | WT | WT | WT | WT | WT |
| TCGA-AB-2840 | LAML | WT | WT | WT | WT | WT | WT | WT | WT | WT |
| TCGA-AB-2807 | LAML | WT | WT | WT | WT | WT | WT | WT | WT | WT |
| TCGA-AB-2858 | LAML | WT | WT | WT | WT | WT | WT | WT | WT | WT |
| TCGA-AB-2848 | LAML | WT | WT | WT | WT | WT | WT | WT | WT | WT |
| TCGA-AB-2940 | LAML | WT | WT | WT | WT | WT | WT | WT | WT | WT |
| TCGA-AB-2988 | LAML | WT | WT | WT | WT | WT | WT | WT | WT | WT |
| TCGA-AB-3008 | LAML | WT | WT | WT | WT | WT | WT | WT | WT | WT |
| TCGA-AB-2998 | LAML | WT | WT | WT | WT | WT | WT | WT | WT | WT |
| TCGA-AB-2813 | LAML | WT | WT | WT | WT | WT | WT | WT | WT | WT |
| TCGA-AB-2884 | LAML | WT | WT | WT | WT | WT | WT | WT | WT | WT |
| TCGA-AB-2918 | LAML | WT | WT | WT | WT | WT | WT | WT | WT | WT |

|              |      |    |    |    |    |    |    |    |    |    |
|--------------|------|----|----|----|----|----|----|----|----|----|
| TCGA-AB-2846 | LAML | WT | WT | WT | WT | WT | WT | WT | WT | WT |
| TCGA-AB-2925 | LAML | WT | WT | WT | WT | WT | WT | WT | WT | WT |
| TCGA-AB-2818 | LAML | WT | WT | WT | WT | WT | WT | WT | WT | WT |
| TCGA-AB-2959 | LAML | WT | WT | WT | WT | WT | WT | WT | WT | WT |
| TCGA-AB-2938 | LAML | WT | WT | WT | WT | WT | WT | WT | WT | WT |
| TCGA-AB-2849 | LAML | WT | WT | WT | WT | WT | WT | WT | WT | WT |
| TCGA-AB-2917 | LAML | WT | WT | WT | WT | WT | WT | WT | WT | WT |
| TCGA-AB-2914 | LAML | WT | WT | WT | WT | WT | WT | WT | WT | WT |
| TCGA-AB-2810 | LAML | WT | WT | WT | WT | WT | WT | WT | WT | WT |
| TCGA-AB-2853 | LAML | WT | WT | WT | WT | WT | WT | WT | WT | WT |
| TCGA-AB-2995 | LAML | WT | WT | WT | WT | WT | WT | WT | WT | WT |
| TCGA-AB-2933 | LAML | WT | WT | WT | WT | WT | WT | WT | WT | WT |
| TCGA-AB-2834 | LAML | WT | WT | WT | WT | WT | WT | WT | WT | WT |
| TCGA-AB-2820 | LAML | WT | WT | WT | WT | WT | WT | WT | WT | WT |
| TCGA-AB-2909 | LAML | WT | WT | WT | WT | WT | WT | WT | WT | WT |
| TCGA-AB-2898 | LAML | WT | WT | WT | WT | WT | WT | WT | WT | WT |
| TCGA-AB-2992 | LAML | WT | WT | WT | WT | WT | WT | WT | WT | WT |
| TCGA-AB-2868 | LAML | WT | WT | WT | WT | WT | WT | WT | WT | WT |
| TCGA-AB-2934 | LAML | WT | WT | WT | WT | WT | WT | WT | WT | WT |
| TCGA-AB-2855 | LAML | WT | WT | WT | WT | WT | WT | WT | WT | WT |
| TCGA-AB-2949 | LAML | WT | WT | WT | WT | WT | WT | WT | WT | WT |
| TCGA-AB-2987 | LAML | WT | WT | WT | WT | WT | WT | WT | WT | WT |
| TCGA-AB-2980 | LAML | WT | WT | WT | WT | WT | WT | WT | WT | WT |
| TCGA-AB-2991 | LAML | WT | WT | WT | WT | WT | WT | WT | WT | WT |
| TCGA-AB-2967 | LAML | WT | WT | WT | WT | WT | WT | WT | WT | WT |
| TCGA-AB-2913 | LAML | WT | WT | WT | WT | WT | WT | WT | WT | WT |
| TCGA-AB-2867 | LAML | WT | WT | WT | WT | WT | WT | WT | WT | WT |
| TCGA-AB-2865 | LAML | WT | WT | WT | WT | WT | WT | WT | WT | WT |
| TCGA-AB-2955 | LAML | WT | WT | WT | WT | WT | WT | WT | WT | WT |
| TCGA-AB-2891 | LAML | WT | WT | WT | WT | WT | WT | WT | WT | WT |
| TCGA-AB-2943 | LAML | WT | WT | WT | WT | WT | WT | WT | WT | WT |
| TCGA-AB-2822 | LAML | WT | WT | WT | WT | WT | WT | WT | WT | WT |
| TCGA-AB-2966 | LAML | WT | WT | WT | WT | WT | WT | WT | WT | WT |
| TCGA-AB-2946 | LAML | WT | WT | WT | WT | WT | WT | WT | WT | WT |
| TCGA-AB-2979 | LAML | WT | WT | WT | WT | WT | WT | WT | WT | WT |
| TCGA-AB-2874 | LAML | WT | WT | WT | WT | WT | WT | WT | WT | WT |
| TCGA-AB-2877 | LAML | WT | WT | WT | WT | WT | WT | WT | WT | WT |
| TCGA-AB-2808 | LAML | WT | WT | WT | WT | WT | WT | WT | WT | WT |
| TCGA-AB-2900 | LAML | WT | WT | WT | WT | WT | WT | WT | WT | WT |

|              |      |    |    |    |    |    |    |    |    |    |
|--------------|------|----|----|----|----|----|----|----|----|----|
| TCGA-AB-2903 | LAML | WT | WT | WT | WT | WT | WT | WT | WT | WT |
| TCGA-AB-2984 | LAML | WT | WT | WT | WT | WT | WT | WT | WT | WT |
| TCGA-AB-2999 | LAML | WT | WT | WT | WT | WT | WT | WT | WT | WT |
| TCGA-AB-3012 | LAML | WT | WT | WT | WT | WT | WT | WT | WT | WT |
| TCGA-AB-2863 | LAML | WT | WT | WT | WT | WT | WT | WT | WT | WT |
| TCGA-AB-2965 | LAML | WT | WT | WT | WT | WT | WT | WT | WT | WT |
| TCGA-AB-2971 | LAML | WT | WT | WT | WT | WT | WT | WT | WT | WT |
| TCGA-AB-2972 | LAML | WT | WT | WT | WT | WT | WT | WT | WT | WT |
| TCGA-AB-2875 | LAML | WT | WT | WT | WT | WT | WT | WT | WT | WT |
| TCGA-AB-2993 | LAML | WT | WT | WT | WT | WT | WT | WT | WT | WT |
| TCGA-AB-2990 | LAML | WT | WT | WT | WT | WT | WT | WT | WT | WT |
| TCGA-AB-2825 | LAML | WT | WT | WT | WT | WT | WT | WT | WT | WT |
| TCGA-AB-2880 | LAML | WT | WT | WT | WT | WT | WT | WT | WT | WT |
| TCGA-AB-2964 | LAML | WT | WT | WT | WT | WT | WT | WT | WT | WT |
| TCGA-AB-2919 | LAML | WT | WT | WT | WT | WT | WT | WT | WT | WT |
| TCGA-AB-3009 | LAML | WT | WT | WT | WT | WT | WT | WT | WT | WT |
| TCGA-AB-2963 | LAML | WT | WT | WT | WT | WT | WT | WT | WT | WT |
| TCGA-AB-2921 | LAML | WT | WT | WT | WT | WT | WT | WT | WT | WT |
| TCGA-AB-2857 | LAML | WT | WT | WT | WT | WT | WT | WT | WT | WT |
| TCGA-AB-2935 | LAML | WT | WT | WT | WT | WT | WT | WT | WT | WT |
| TCGA-AB-2873 | LAML | WT | WT | WT | WT | WT | WT | WT | WT | WT |
| TCGA-AB-2924 | LAML | WT | WT | WT | WT | WT | WT | WT | WT | WT |
| TCGA-AB-2838 | LAML | WT | WT | WT | WT | WT | WT | WT | WT | WT |
| TCGA-AB-3005 | LAML | WT | WT | WT | WT | WT | WT | WT | WT | WT |
| TCGA-AB-3002 | LAML | WT | WT | WT | WT | WT | WT | WT | WT | WT |
| TCGA-AB-2826 | LAML | WT | WT | WT | WT | WT | WT | WT | WT | WT |
| TCGA-AB-2911 | LAML | WT | WT | WT | WT | WT | WT | WT | WT | WT |
| TCGA-AB-2862 | LAML | WT | WT | WT | WT | WT | WT | WT | WT | WT |
| TCGA-AB-2975 | LAML | WT | WT | WT | WT | WT | WT | WT | WT | WT |
| TCGA-AB-2910 | LAML | WT | WT | WT | WT | WT | WT | WT | WT | WT |
| TCGA-AB-2888 | LAML | WT | WT | WT | WT | WT | WT | WT | WT | WT |
| TCGA-AB-2970 | LAML | WT | WT | WT | WT | WT | WT | WT | WT | WT |
| TCGA-AB-2803 | LAML | WT | WT | WT | WT | WT | WT | WT | WT | WT |
| TCGA-AB-2832 | LAML | WT | WT | WT | WT | WT | WT | WT | WT | WT |
| TCGA-AB-2814 | LAML | WT | WT | WT | WT | WT | WT | WT | WT | WT |
| TCGA-AB-2869 | LAML | WT | WT | WT | WT | WT | WT | WT | WT | WT |
| TCGA-AB-2944 | LAML | WT | WT | WT | WT | WT | WT | WT | WT | WT |
| TCGA-AB-2950 | LAML | WT | WT | WT | WT | WT | WT | WT | WT | WT |
| TCGA-AB-2927 | LAML | WT | WT | WT | WT | WT | WT | WT | WT | WT |

|              |      |    |    |    |    |    |    |    |    |    |
|--------------|------|----|----|----|----|----|----|----|----|----|
| TCGA-AB-2916 | LAML | WT | WT | WT | WT | WT | WT | WT | WT | WT |
| TCGA-AB-2889 | LAML | WT | WT | WT | WT | WT | WT | WT | WT | WT |
| TCGA-AB-2901 | LAML | WT | WT | WT | WT | WT | WT | WT | WT | WT |
| TCGA-AB-2845 | LAML | WT | WT | WT | WT | WT | WT | WT | WT | WT |
| TCGA-AB-2969 | LAML | WT | WT | WT | WT | WT | WT | WT | WT | WT |
| TCGA-AB-2854 | LAML | WT | WT | WT | WT | WT | WT | WT | WT | WT |
| TCGA-AB-3006 | LAML | WT | WT | WT | WT | WT | WT | WT | WT | WT |
| TCGA-AB-2887 | LAML | WT | WT | WT | WT | WT | WT | WT | WT | WT |
| TCGA-AB-2805 | LAML | WT | WT | WT | WT | WT | WT | WT | WT | WT |
| TCGA-AB-2860 | LAML | WT | WT | WT | WT | WT | WT | WT | WT | WT |
| TCGA-AB-2986 | LAML | WT | WT | WT | WT | WT | WT | WT | WT | WT |
| TCGA-AB-2812 | LAML | WT | WT | WT | WT | WT | WT | WT | WT | WT |
| TCGA-AB-2811 | LAML | WT | WT | WT | WT | WT | WT | WT | WT | WT |
| TCGA-AB-2915 | LAML | WT | WT | WT | WT | WT | WT | WT | WT | WT |
| TCGA-AB-2881 | LAML | WT | WT | WT | WT | WT | WT | WT | WT | WT |
| TCGA-AB-2890 | LAML | WT | WT | WT | WT | WT | WT | WT | WT | WT |
| TCGA-AB-2981 | LAML | WT | WT | WT | WT | WT | WT | WT | WT | WT |
| TCGA-AB-2830 | LAML | WT | WT | WT | WT | WT | WT | WT | WT | WT |
| TCGA-AB-2954 | LAML | WT | WT | WT | WT | WT | WT | WT | WT | WT |
| TCGA-AB-2952 | LAML | WT | WT | WT | WT | WT | WT | WT | WT | WT |

**Table S2:** Splicing factors reported to be significantly altered in previous studies where *U2AF1* is somatically mutated.

| <b>Splicing Factor</b> | <b>Reference</b> |
|------------------------|------------------|
| <i>HNRNPK</i>          | [2]              |
| <i>PRPF40B</i>         | [3]              |
| <i>RBM10</i>           | [4]              |
| <i>SF1</i>             | [3]              |
| <i>SF3A1</i>           | [3]              |
| <i>SF3B1</i>           | [3]              |
| <i>SRSF2</i>           | [3]              |
| <i>U2AF2</i>           | [3]              |
| <i>ZRSR2</i>           | [3]              |

**Table S3:** Mitotic cell cycle genes that show differential splicing in the presence of the *U2AF1* S34F/Y mutation.

| <b>Gene</b>    | <b>GO:0000278<br/>:mitotic cell<br/>cycle</b> | <b>GO:0000087<br/>:M phase of<br/>mitotic cell<br/>cycle</b> | <b>U2AF1<br/>S34F/Y-<br/>associated<br/>differential<br/>splicing in<br/>AML</b> | <b>U2AF1<br/>S34F-<br/>associated<br/>differential<br/>splicing in<br/>lung<br/>adenocarci-<br/>noma</b> |
|----------------|-----------------------------------------------|--------------------------------------------------------------|----------------------------------------------------------------------------------|----------------------------------------------------------------------------------------------------------|
| <i>ANAPC1</i>  | x                                             | x                                                            | x                                                                                |                                                                                                          |
| <i>ANAPC10</i> | x                                             | x                                                            | x                                                                                |                                                                                                          |
| <i>ANAPC5</i>  | x                                             | x                                                            | x                                                                                |                                                                                                          |
| <i>ANLN</i>    | x                                             |                                                              | x                                                                                |                                                                                                          |
| <i>BLZF1</i>   | x                                             | x                                                            |                                                                                  | x                                                                                                        |
| <i>BUB3</i>    | x                                             | x                                                            | x                                                                                |                                                                                                          |
| <i>CCNH</i>    | x                                             |                                                              | x                                                                                |                                                                                                          |
| <i>CDC27</i>   | x                                             | x                                                            | x                                                                                |                                                                                                          |
| <i>CENPO</i>   | x                                             | x                                                            | x                                                                                |                                                                                                          |
| <i>CEP192</i>  | x                                             |                                                              | x                                                                                |                                                                                                          |
| <i>CHEK2</i>   | x                                             |                                                              | x                                                                                |                                                                                                          |
| <i>CKAP5</i>   | x                                             | x                                                            | x                                                                                |                                                                                                          |
| <i>DDX11</i>   | x                                             |                                                              | x                                                                                |                                                                                                          |
| <i>EZH2</i>    | x                                             |                                                              | x                                                                                |                                                                                                          |
| <i>FAM111A</i> | x                                             | x                                                            | x                                                                                |                                                                                                          |
| <i>FGFR1OP</i> | x                                             |                                                              | x                                                                                |                                                                                                          |
| <i>ITGB3BP</i> | x                                             | x                                                            | x                                                                                |                                                                                                          |
| <i>LIG1</i>    | x                                             |                                                              | x                                                                                |                                                                                                          |
| <i>MNAT1</i>   | x                                             |                                                              | x                                                                                |                                                                                                          |
| <i>NAE1</i>    | x                                             |                                                              |                                                                                  | x                                                                                                        |
| <i>NUSAP1</i>  | x                                             |                                                              | x                                                                                |                                                                                                          |
| <i>OPTN</i>    | x                                             |                                                              |                                                                                  | x                                                                                                        |
| <i>PCM1</i>    | x                                             |                                                              | x                                                                                |                                                                                                          |
| <i>RBL1</i>    | x                                             |                                                              | x                                                                                |                                                                                                          |
| <i>SEC13</i>   | x                                             | x                                                            | x                                                                                |                                                                                                          |
| <i>SFI1</i>    | x                                             |                                                              | x                                                                                |                                                                                                          |
| <i>SH2B1</i>   | x                                             |                                                              | x                                                                                |                                                                                                          |
| <i>TERF1</i>   | x                                             |                                                              | x                                                                                |                                                                                                          |
| <i>TFDP1</i>   | x                                             |                                                              | x                                                                                |                                                                                                          |
| <i>TFDP2</i>   | x                                             |                                                              | x                                                                                |                                                                                                          |
| <i>WAPAL</i>   | x                                             | x                                                            | x                                                                                |                                                                                                          |

**Table S4:** Cancer Gene Census genes differentially spliced in the presence of a *U2AF1* S34F/Y mutation.

| <b>Gene</b>    | <b>U2AF1 S34F/Y-associated differential splicing in AML</b> | <b>U2AF1 S34F-associated differential splicing in lung adenocarcinoma</b> |
|----------------|-------------------------------------------------------------|---------------------------------------------------------------------------|
| <i>ATRX</i>    | x                                                           |                                                                           |
| <i>BCL9</i>    |                                                             | x                                                                         |
| <i>BCOR</i>    | x                                                           |                                                                           |
| <i>CHCHD7</i>  | x                                                           | x                                                                         |
| <i>CHEK2</i>   | x                                                           |                                                                           |
| <i>CTNNB1</i>  | x                                                           | x                                                                         |
| <i>EIF4A2</i>  | x                                                           |                                                                           |
| <i>EZH2</i>    | x                                                           |                                                                           |
| <i>FGFR1OP</i> | x                                                           |                                                                           |
| <i>FIP1L1</i>  | x                                                           |                                                                           |
| <i>FLT3</i>    | x                                                           |                                                                           |
| <i>KDM6A</i>   | x                                                           |                                                                           |
| <i>NCOA2</i>   | x                                                           |                                                                           |
| <i>NIN</i>     | x                                                           |                                                                           |
| <i>PCM1</i>    | x                                                           |                                                                           |
| <i>PDGFRA</i>  | x                                                           |                                                                           |
| <i>PICALM</i>  | x                                                           | x                                                                         |
| <i>RAD51L1</i> |                                                             | x                                                                         |
| <i>RALGDS</i>  | x                                                           |                                                                           |
| <i>U2AF1</i>   |                                                             | x                                                                         |
| <i>WHSC1</i>   | x                                                           |                                                                           |

**Table S5:** Taqman assays (Life Technologies) used for quantitative RT-PCR of splicing events in *CHCHD7*, *CHEK2*, *CTNNB1*, *KARS*, and, *PTBP1*.

| <b>Gene</b>   | <b>Target</b>     | <b>AssayID</b> |
|---------------|-------------------|----------------|
| <i>CHCHD7</i> | constitutive      | Hs00225599_m1  |
| <i>CHCHD7</i> | inclusion isoform | Hs03044402_m1  |
| <i>CHEK2</i>  | constitutive      | Hs01007281_m1  |
| <i>CHEK2</i>  | inclusion isoform | custom         |
| <i>CTNNB1</i> | constitutive      | Hs00991811_m1  |
| <i>CTNNB1</i> | inclusion isoform | Hs00991812_g1  |
| <i>KARS</i>   | constitutive      | Hs00271471_m1  |
| <i>KARS</i>   | inclusion isoform | custom         |
| <i>PTBP1</i>  | constitutive      | Hs00738538_g1  |
| <i>PTBP1</i>  | inclusion isoform | Hs00914697_g1  |



## References

1. Przychodzen B, Jerez A, Guinta K, Sekeres MA, Padgett R, et al. (2013) Patterns of missplicing due to somatic U2AF1 mutations in myeloid neoplasms. *Blood*. doi:10.1182/blood-2013-01-480970.
2. The Cancer Genome Atlas Research Network (2013) Genomic and Epigenomic Landscapes of Adult De Novo Acute Myeloid Leukemia. *N Engl J Med*. doi:10.1056/NEJMoa1301689.
3. Yoshida K, Sanada M, Shiraishi Y, Nowak D, Nagata Y, et al. (2011) Frequent pathway mutations of splicing machinery in myelodysplasia. *Nature* 478: 64–69. doi:10.1038/nature10496.
4. Imielinski M, Berger AH, Hammerman PS, Hernandez B, Pugh TJ, et al. (2012) Mapping the hallmarks of lung adenocarcinoma with massively parallel sequencing. *Cell* 150: 1107–1120. doi:10.1016/j.cell.2012.08.029.
